# Supplementary material for: Influence of thickness and morphology of MoS2on the performance of counter electrodes in dye-sensitized solar cells
Source: publisher site journal article supplement (doi:10.3762/bjnano.13.44), 2022-06-17
Supplement: Additional file 1 [file 2190-4286-13-44-S1.pdf]

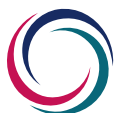

## Supporting Information

for

### **Influence of thickness and morphology of MoS<sub>2</sub> on the performance of counter electrodes in dye-sensitized solar cells**

Lam Thuy Thi Mai, Hai Viet Le, Ngan Kim Thi Nguyen, Van La Tran Pham, Thu Anh Thi Nguyen, Nguyen Thanh Le Huynh and Hoang Thai Nguyen

*Beilstein J. Nanotechnol.* **2022**, *13*, 528–537. doi:10.3762/bjnano.13.44

## Additional experimental data

## AFM and electrical conductivity characterization of devices

The AFM method was performed using a FlexAFM (Nanosurf, Switzerland) under ambient conditions using a cantilever type NCLR. The Electrical conductivity of the MoS<sub>2</sub> films deposited on the FTO substrates was measured with a Keithley model 2400 multisource meter at room temperature.

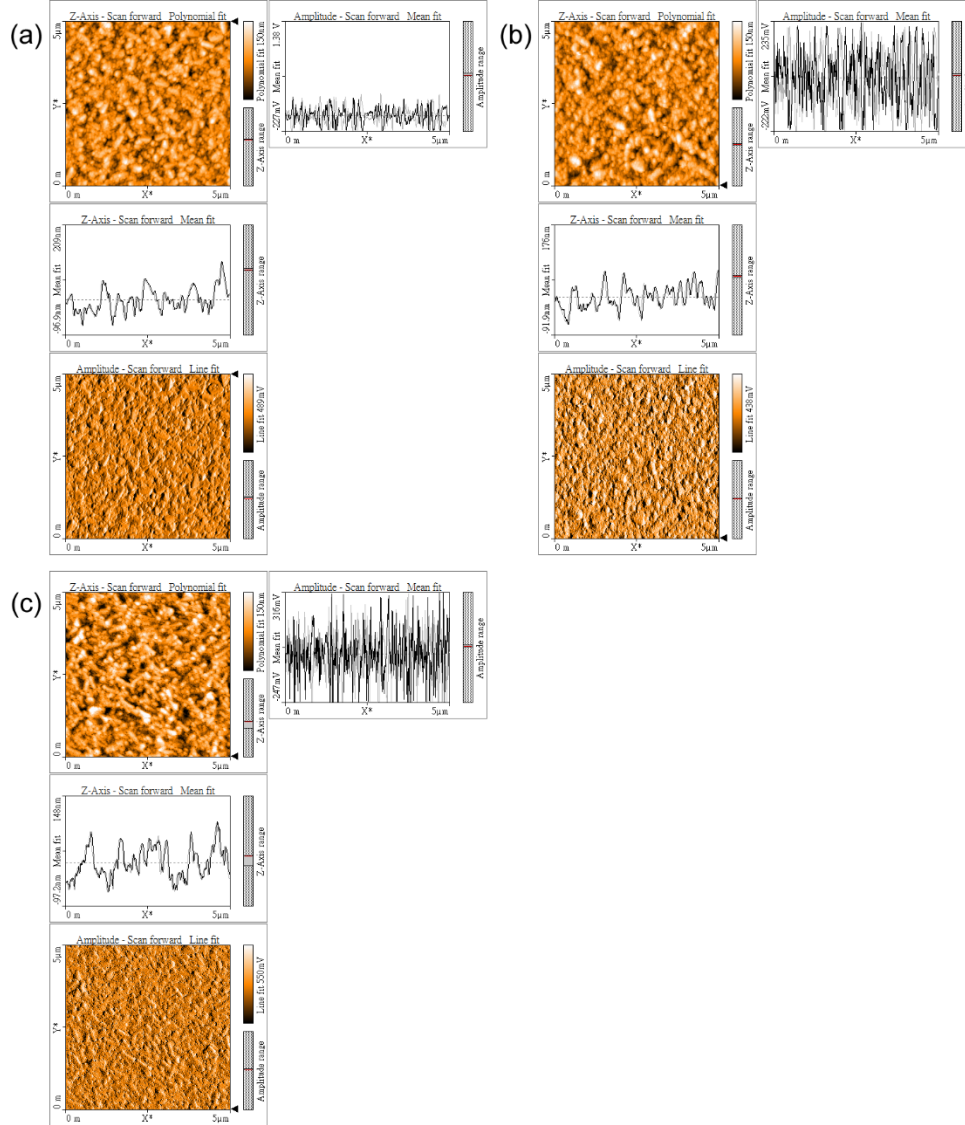

**Figure S1:** AFM images of (a) MoS<sub>2</sub>-1.25/FTO, (b) MoS<sub>2</sub>-2.5/FTO, and (c) MoS<sub>2</sub>-5.0/FTO.

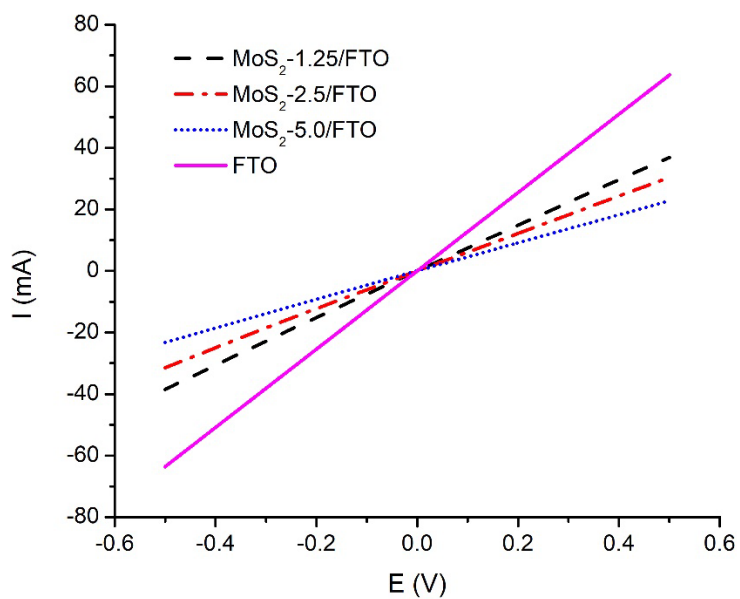

**Figure S2:** Current–voltage ( $I$ – $V$ ) plots of MoS<sub>2</sub> thin films compared to that of the FTO substrate.

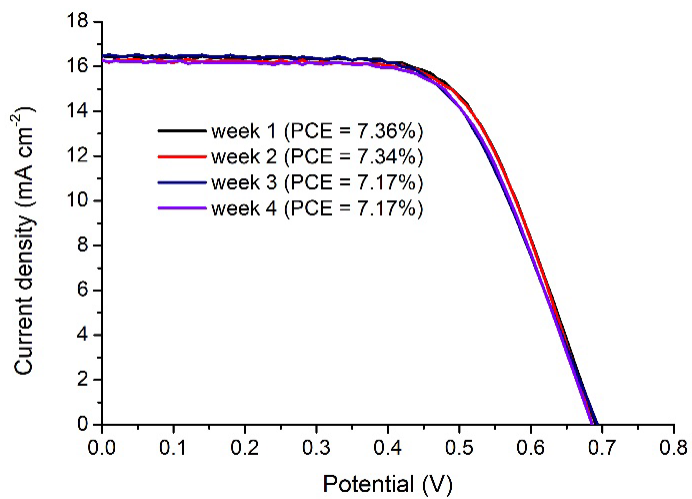

**Figure S3:** Photovoltaic performance of the DSSCs fabricated from MoS<sub>2</sub>-1.25/FTO over four weeks of testing.

**Table S1:** AFM image roughness and  $I$ – $V$  electrical conductivity of the MoS<sub>2</sub> thin films.

| Sample                 | AFM-images roughness               |                                             | $I$ – $V$ electrical conductivity<br>(mS·cm <sup>−1</sup> ) |
|------------------------|------------------------------------|---------------------------------------------|-------------------------------------------------------------|
|                        | average roughness<br>( $S_a$ , nm) | root mean square roughness<br>( $S_q$ , nm) |                                                             |
| MoS <sub>2</sub> -1.25 | 19.111                             | 23.895                                      | 75                                                          |
| MoS <sub>2</sub> -2.5  | 19.822                             | 24.981                                      | 61                                                          |
| MoS <sub>2</sub> -5.0  | 24.179                             | 30.443                                      | 46                                                          |
